# Supplementary material
Source: Springer Nature journal article supplement (https://www.springermedizin.de/resource/supplementary/12879_2009_1017_MOESM3_ESM.pdf/9442394)

**A**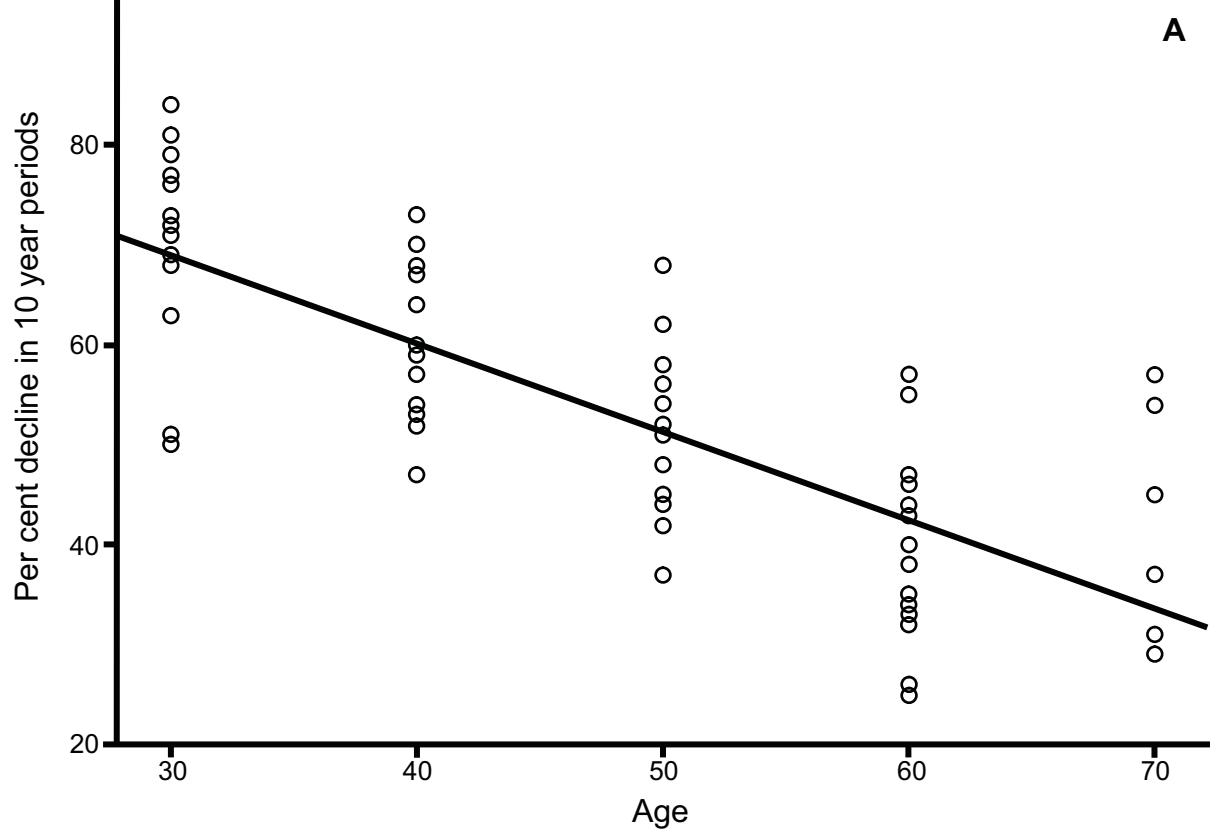**B**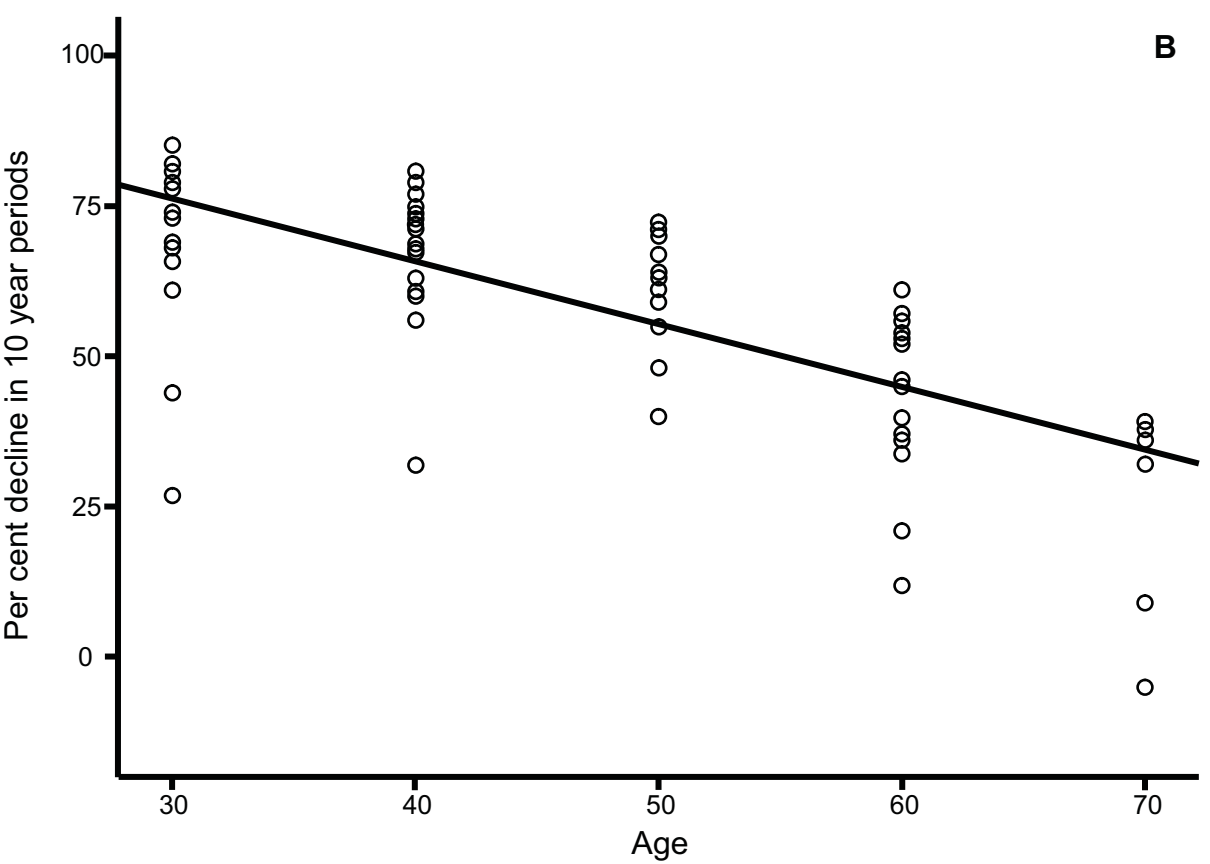

Supplement: MOESM3 [file 9442394]
